# Supplementary material for: Schottky DC generators from polypyrrole nanocomposites of N-type semiconductor metal oxides and the multiple device connection effect
Source: Royal Society of Chemistry journal article supplement (doi:10.1039/d2ta06498g), 2022-12-05
Supplement: d2ta06498g1.pdf [file d2ta06498g1.pdf]

## Electronic Supplementary Information

### **Schottky DC Generators from Polypyrrole Nanocomposite of N-type Semiconductor Metal Oxides and Multiple Device Connection Effect**

Xiang Ding <sup>a</sup>, Hao Shao <sup>a</sup>, Hongxia Wang <sup>a</sup>, Haibo Chang <sup>b</sup>, Ruixi Bai <sup>a</sup>, Jian Fang <sup>c</sup>, Weidong Yang <sup>d</sup>, Tong Lin <sup>e,\*</sup>

<sup>a</sup> Institute for Frontier Materials, Deakin University, Geelong, VIC 3216, Australia

<sup>b</sup> Institute of Functional Polymer Composites, College of Chemistry and Chemical Engineering, Henan University, Kaifeng 475004, China.

<sup>c</sup> College of Textile and Clothing Engineering, Soochow University, Suzhou, 215123, China

<sup>d</sup> Future Manufacturing Flagship, CSIRO, Clayton South, VIC 3169, Australia

<sup>e</sup> State Key Laboratory of Separation Membranes and Membrane Processes/Institute for Nanofiber Intelligent Manufacture and Applications, School of Textile Science and Engineering, Tiangong University, Tianjin 300387, China

\*Corresponding author: Tong Lin; E-mail: [tong.lin@tiangong.edu.cn](mailto:tong.lin@tiangong.edu.cn)

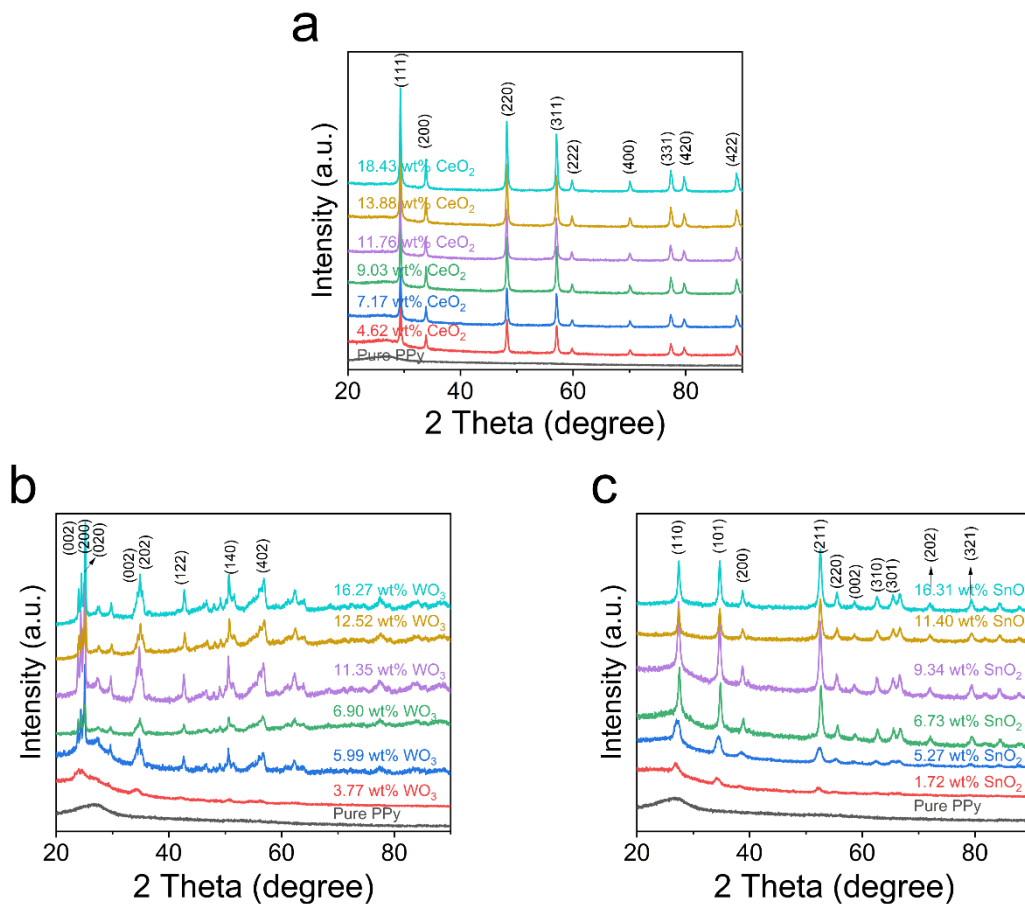

**Fig. S1** XRD patterns of (a) PPy-CeO<sub>2</sub>, (b) PPy-WO<sub>3</sub>, and (c) PPy-SnO<sub>2</sub> nanocomposites with different metal oxide contents.

For PPy-CeO<sub>2</sub>, the peaks at  $2\theta = 28.27^\circ$ ,  $33.09^\circ$ ,  $47.34^\circ$ ,  $56.36^\circ$ ,  $59.36^\circ$ ,  $69.43^\circ$ ,  $76.74^\circ$ , and  $79.74^\circ$  were assigned to the (111), (200), (220), (311), (222), (400), (331) and (422) crystal planes of CeO<sub>2</sub>, respectively. All peaks are in good agreement with the standard CeO<sub>2</sub><sup>1</sup>.

For PPy-WO<sub>3</sub>, the peaks of nanocomposite at  $2\theta = 23.1^\circ$ ,  $23.6^\circ$ ,  $24.4^\circ$ ,  $26.6^\circ$ ,  $28.9^\circ$ ,  $33.3^\circ$ ,  $34.2^\circ$ , and  $36.2^\circ$  corresponded to the (002), (020), (200), (120), (112), (022), (202), and (212) planes of monoclinic WO<sub>3</sub><sup>2</sup>.

For PPy-SnO<sub>2</sub>, the peaks at  $2\theta = 26.49^\circ$ ,  $33.77^\circ$ ,  $38^\circ$ ,  $51.72^\circ$ ,  $54.78^\circ$ ,  $57.95^\circ$ ,  $61.86^\circ$ ,  $64.77^\circ$ , and  $66^\circ$ , which are assigned to scattering from (110), (101), (200), (211), (220), (002), (310), (112) and (301) reflection planes of tetragonal SnO<sub>2</sub><sup>3</sup>.

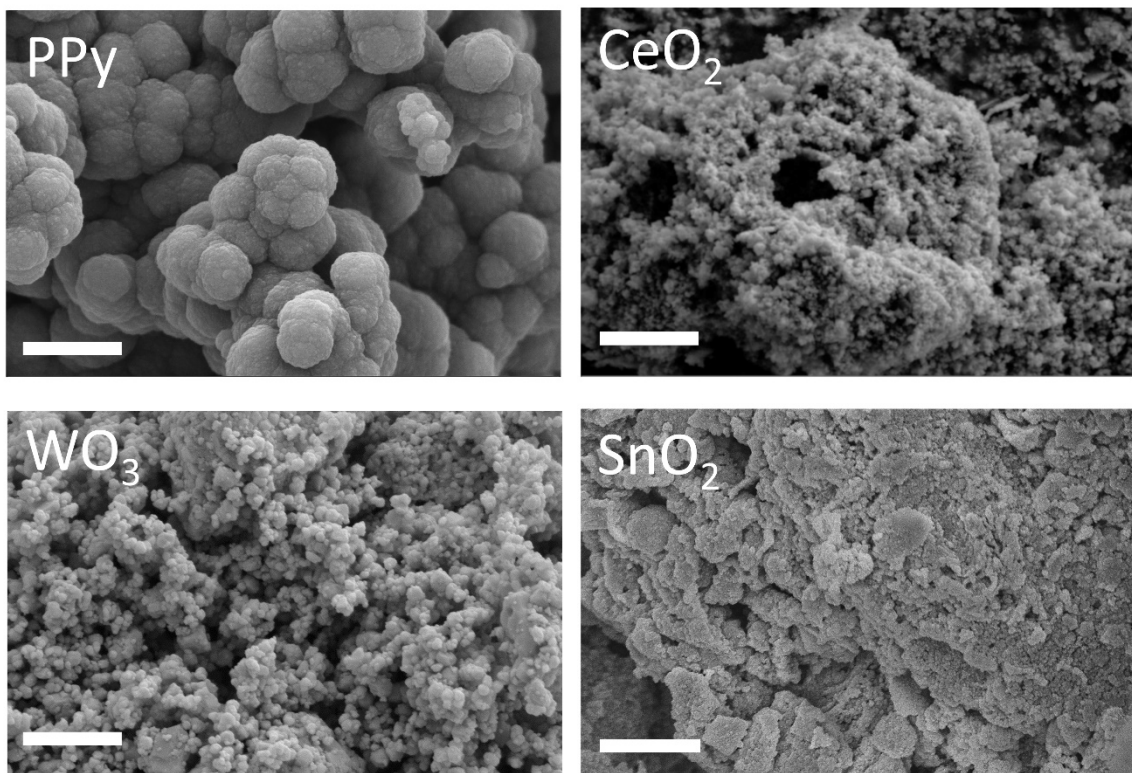

**Fig. S2** SEM images of pure PPy and raw metal oxide materials ( $\text{CeO}_2$ ,  $\text{WO}_3$ , and  $\text{SnO}_2$ ) (scale bar: 1  $\mu\text{m}$ ).

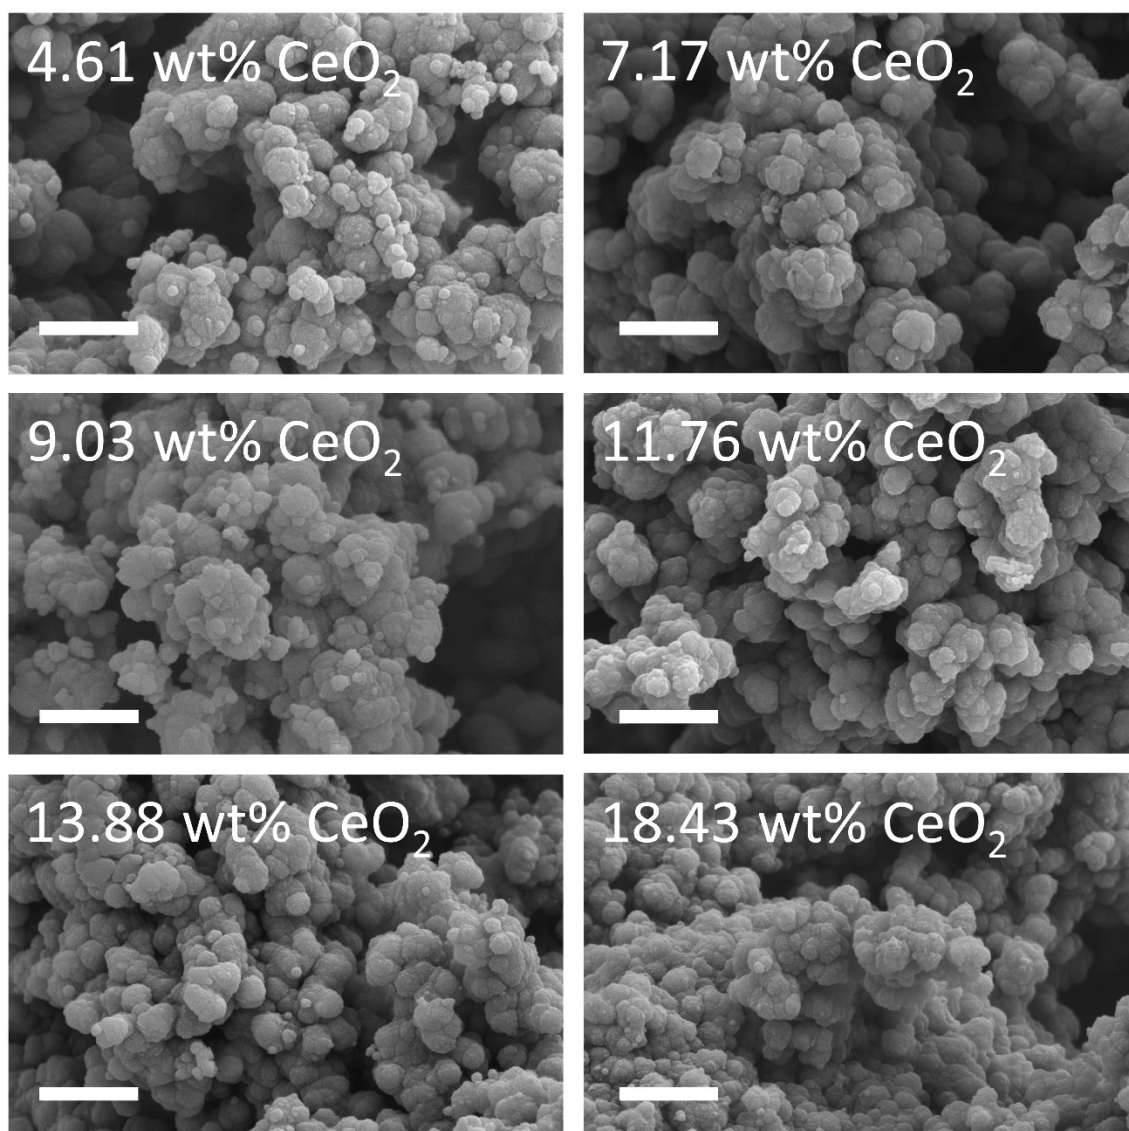

**Fig. S3** SEM images of PPy-CeO<sub>2</sub> nanocomposites containing different CeO<sub>2</sub> contents (scale bar: 1 μm).

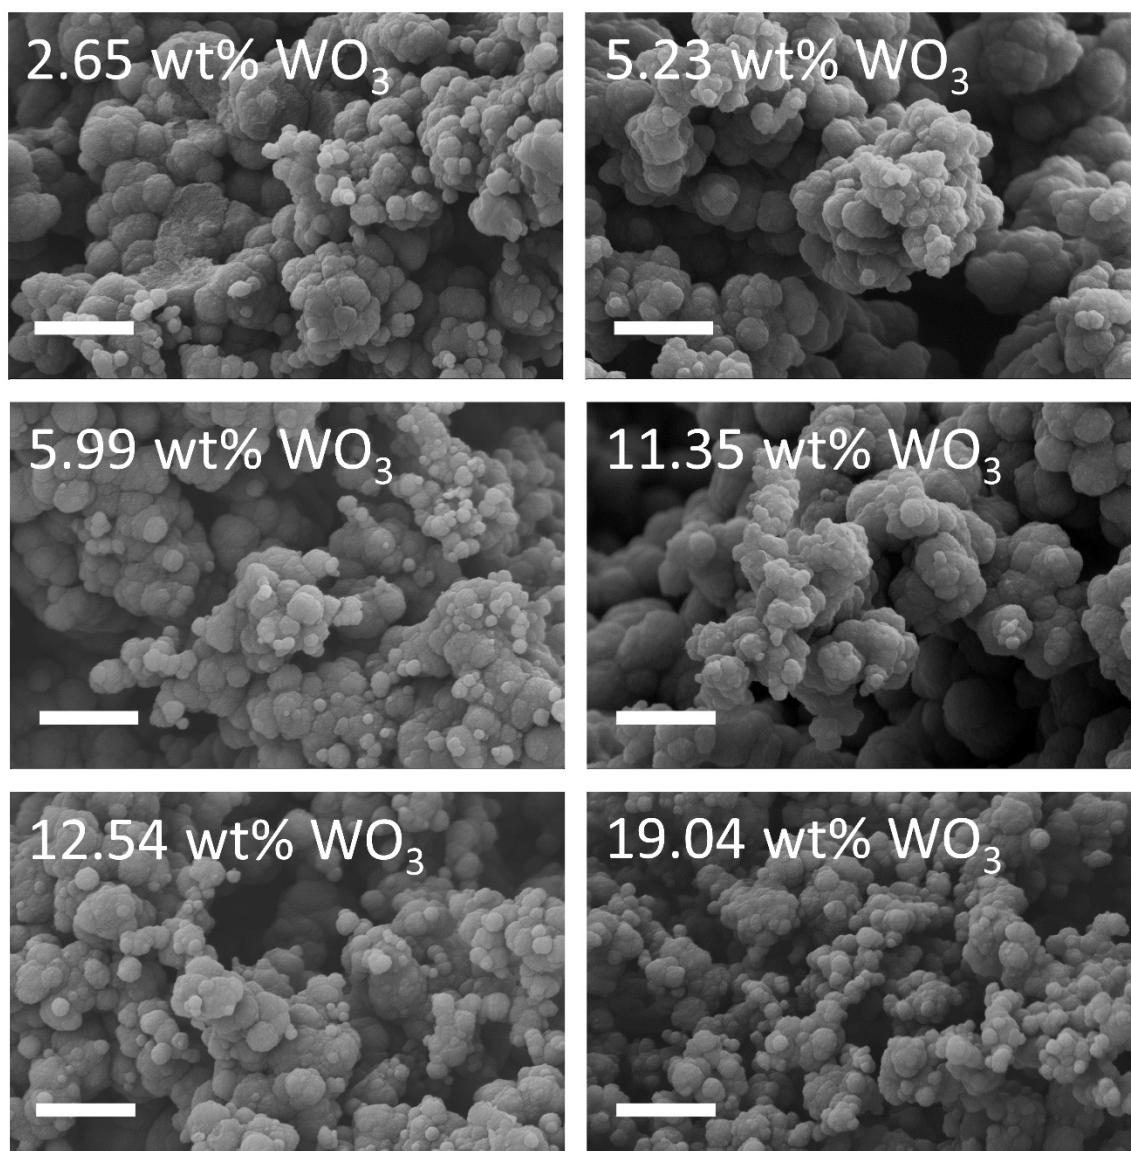

**Fig. S4** SEM images of PPy-WO<sub>3</sub> nanocomposites containing different WO<sub>3</sub> contents (scale bar: 1 μm).

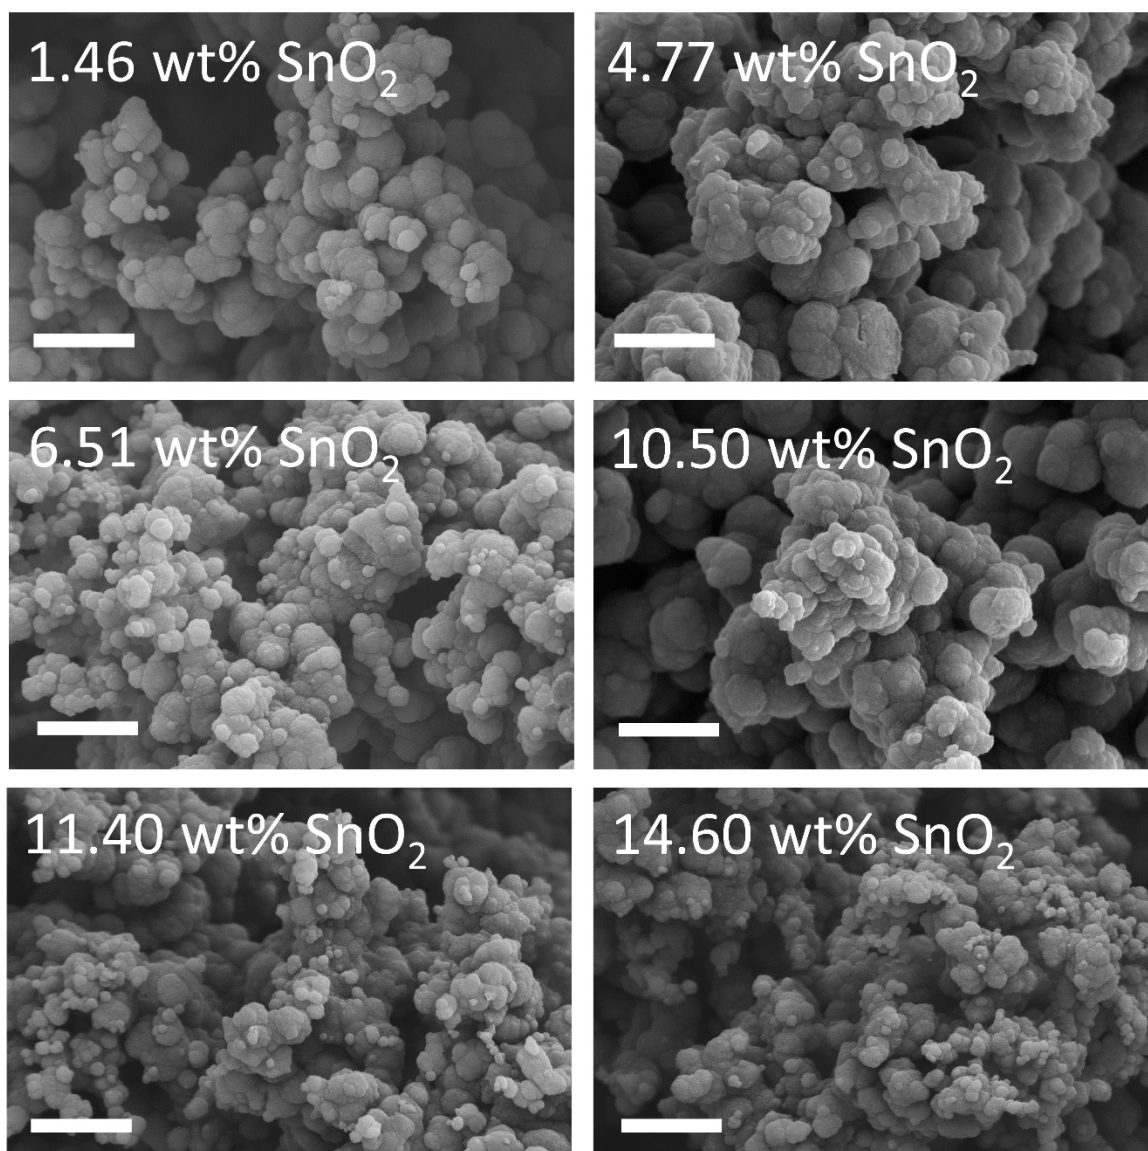

**Fig. S5** SEM images of PPy-SnO<sub>2</sub> nanocomposites containing different SnO<sub>2</sub> contents (scale bar: 1 μm).

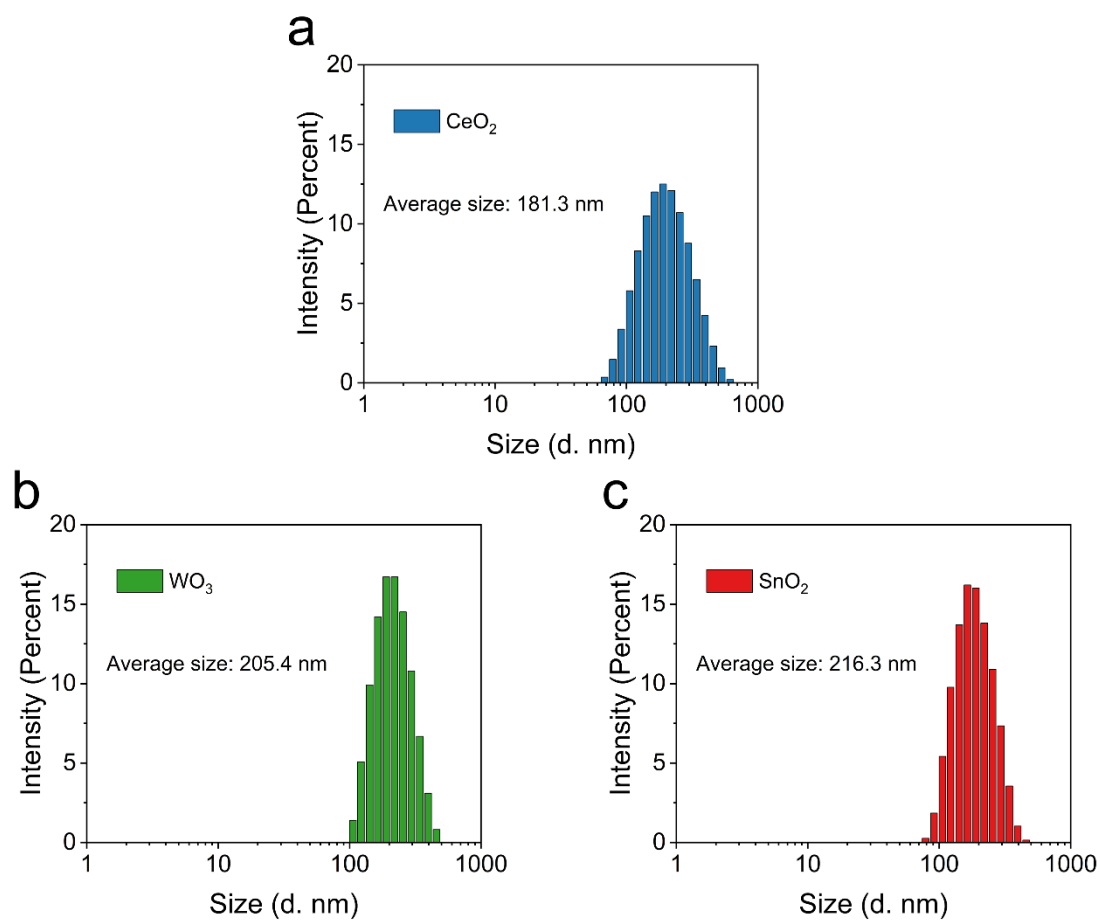

**Fig. S6** Malvern Zetasizer Nano size measurement of (a)  $\text{CeO}_2$ , (b)  $\text{WO}_3$ , and (c)  $\text{SnO}_2$  nanoparticles.

**Table S1** BET surface area of raw metal oxide materials.

| Materials                                       | $\text{CeO}_2$ | $\text{WO}_3$ | $\text{SnO}_2$ |
|-------------------------------------------------|----------------|---------------|----------------|
| BET surface area ( $\text{m}^2 \text{g}^{-1}$ ) | 38.106         | 8.051         | 21.607         |

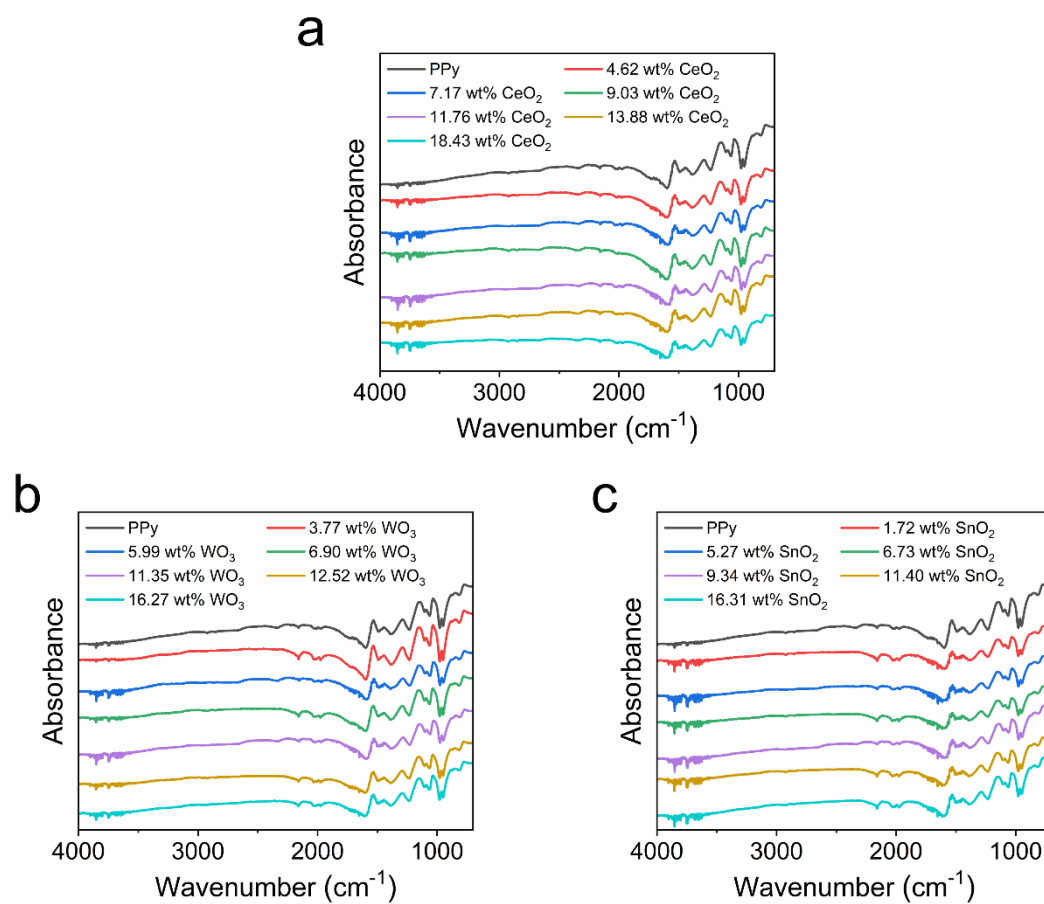

**Fig. S7** FTIR spectra of (a) PPy-CeO<sub>2</sub>, (b) PPy-WO<sub>3</sub>, and (c) PPy-SnO<sub>2</sub> nanocomposites with different metal oxide contents.

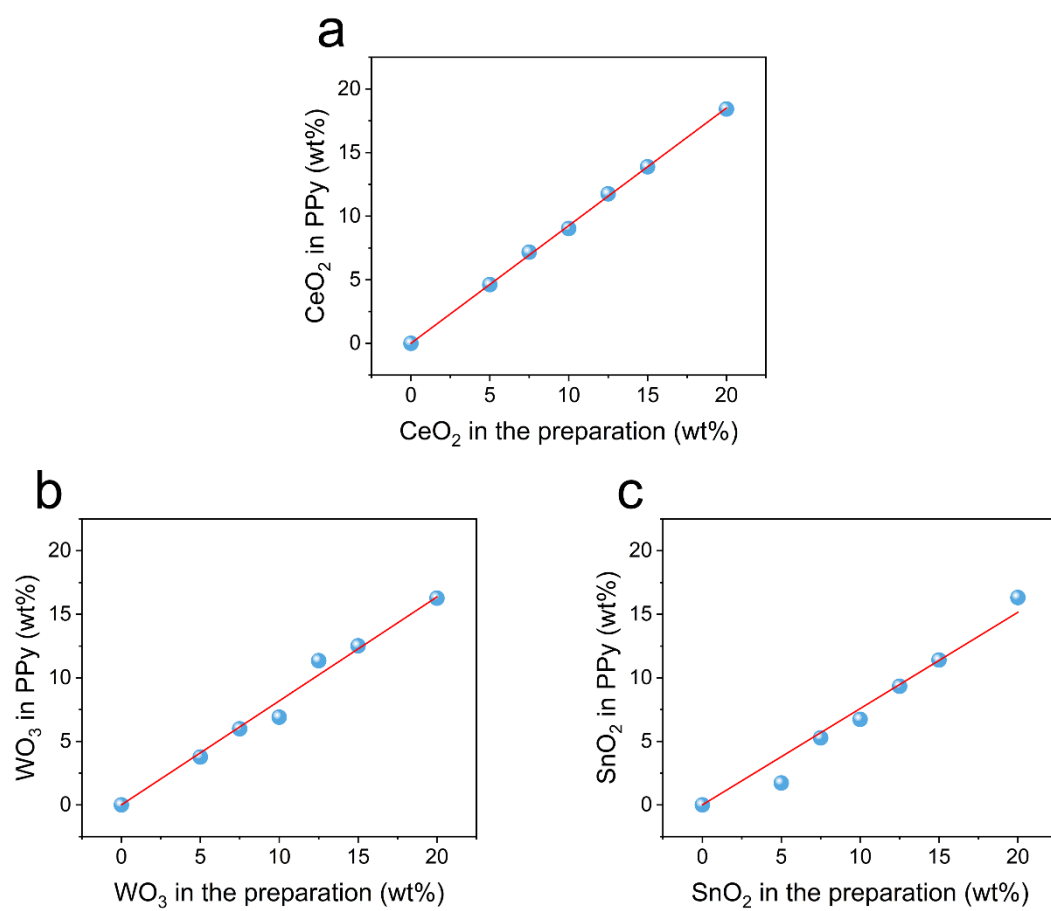

**Fig. S8** Effect of (a) CeO<sub>2</sub>, (b) WO<sub>3</sub>, and (c) SnO<sub>2</sub> content in the PPy synthesis (based on pyrrole) on its actual content in the nanocomposites.

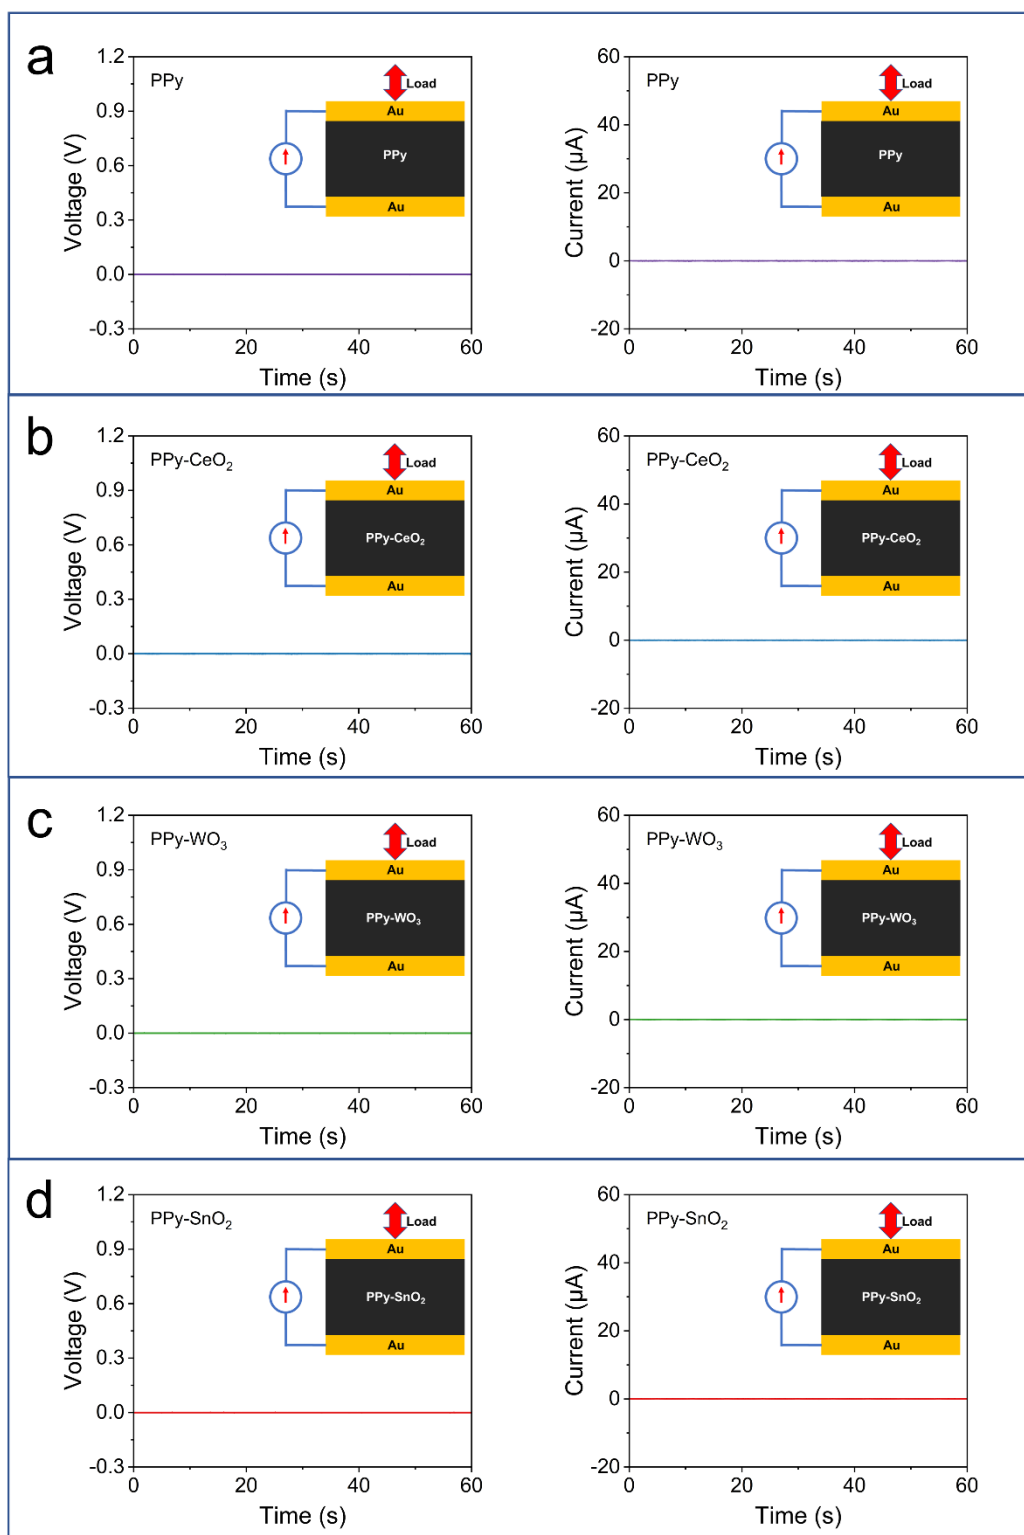

**Fig. S9** Electrical response of (a) Au/PPy/Au, (b) Au/PPy-CeO<sub>2</sub>/Au, (c) Au/PPy-WO<sub>3</sub>/Au, and Au/PPy-SnO<sub>2</sub>/Au devices under repeated compressive deformation (metal oxide content: 7.17 wt%, 6.90 wt%, and 6.73 wt% for PPy-CeO<sub>2</sub>, PPy-WO<sub>3</sub>, and PPy-SnO<sub>2</sub>, strain rate: 6.0%, compressing & releasing speed: 0.035 mm s<sup>-1</sup>).

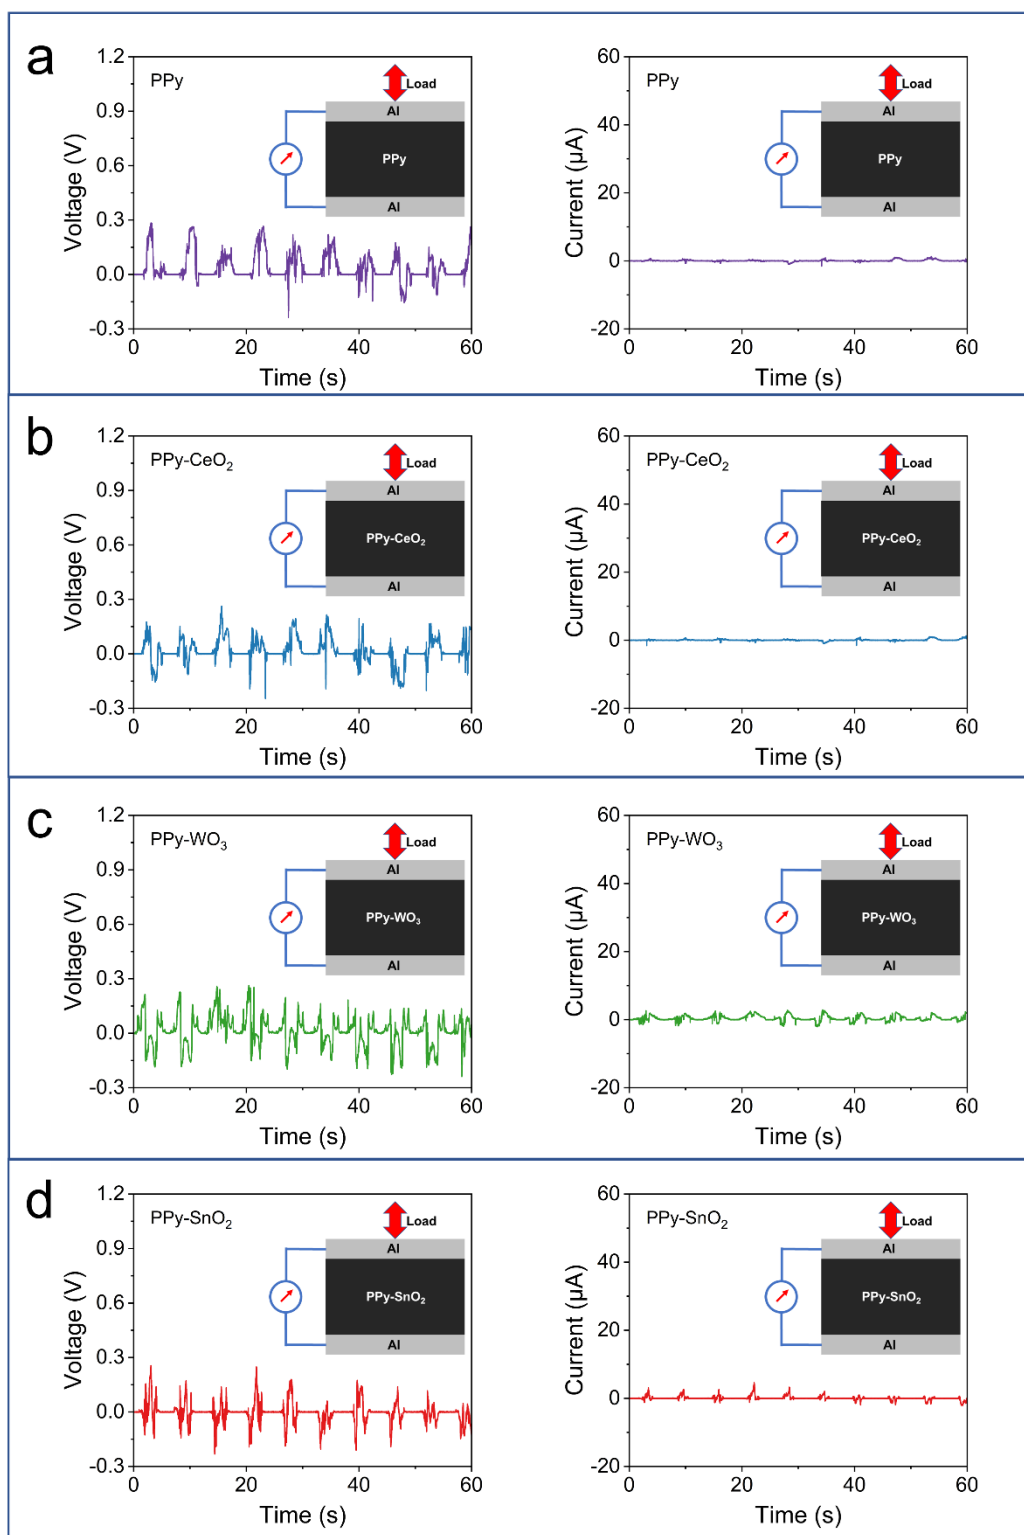

**Fig. S10** Electrical response of (a) Al/PPy/Al, (b) Al/PPy-CeO<sub>2</sub>/Al, (c) Al/PPy-WO<sub>3</sub>/Al, and Al/PPy-SnO<sub>2</sub>/Al devices under repeated compressive deformation (metal oxide content: 7.17 wt%, 6.90 wt%, and 6.73 wt% for PPy-CeO<sub>2</sub>, PPy-WO<sub>3</sub>, and PPy-SnO<sub>2</sub>, strain rate: 6.0%, compressing & releasing speed: 0.035mm s<sup>-1</sup>).

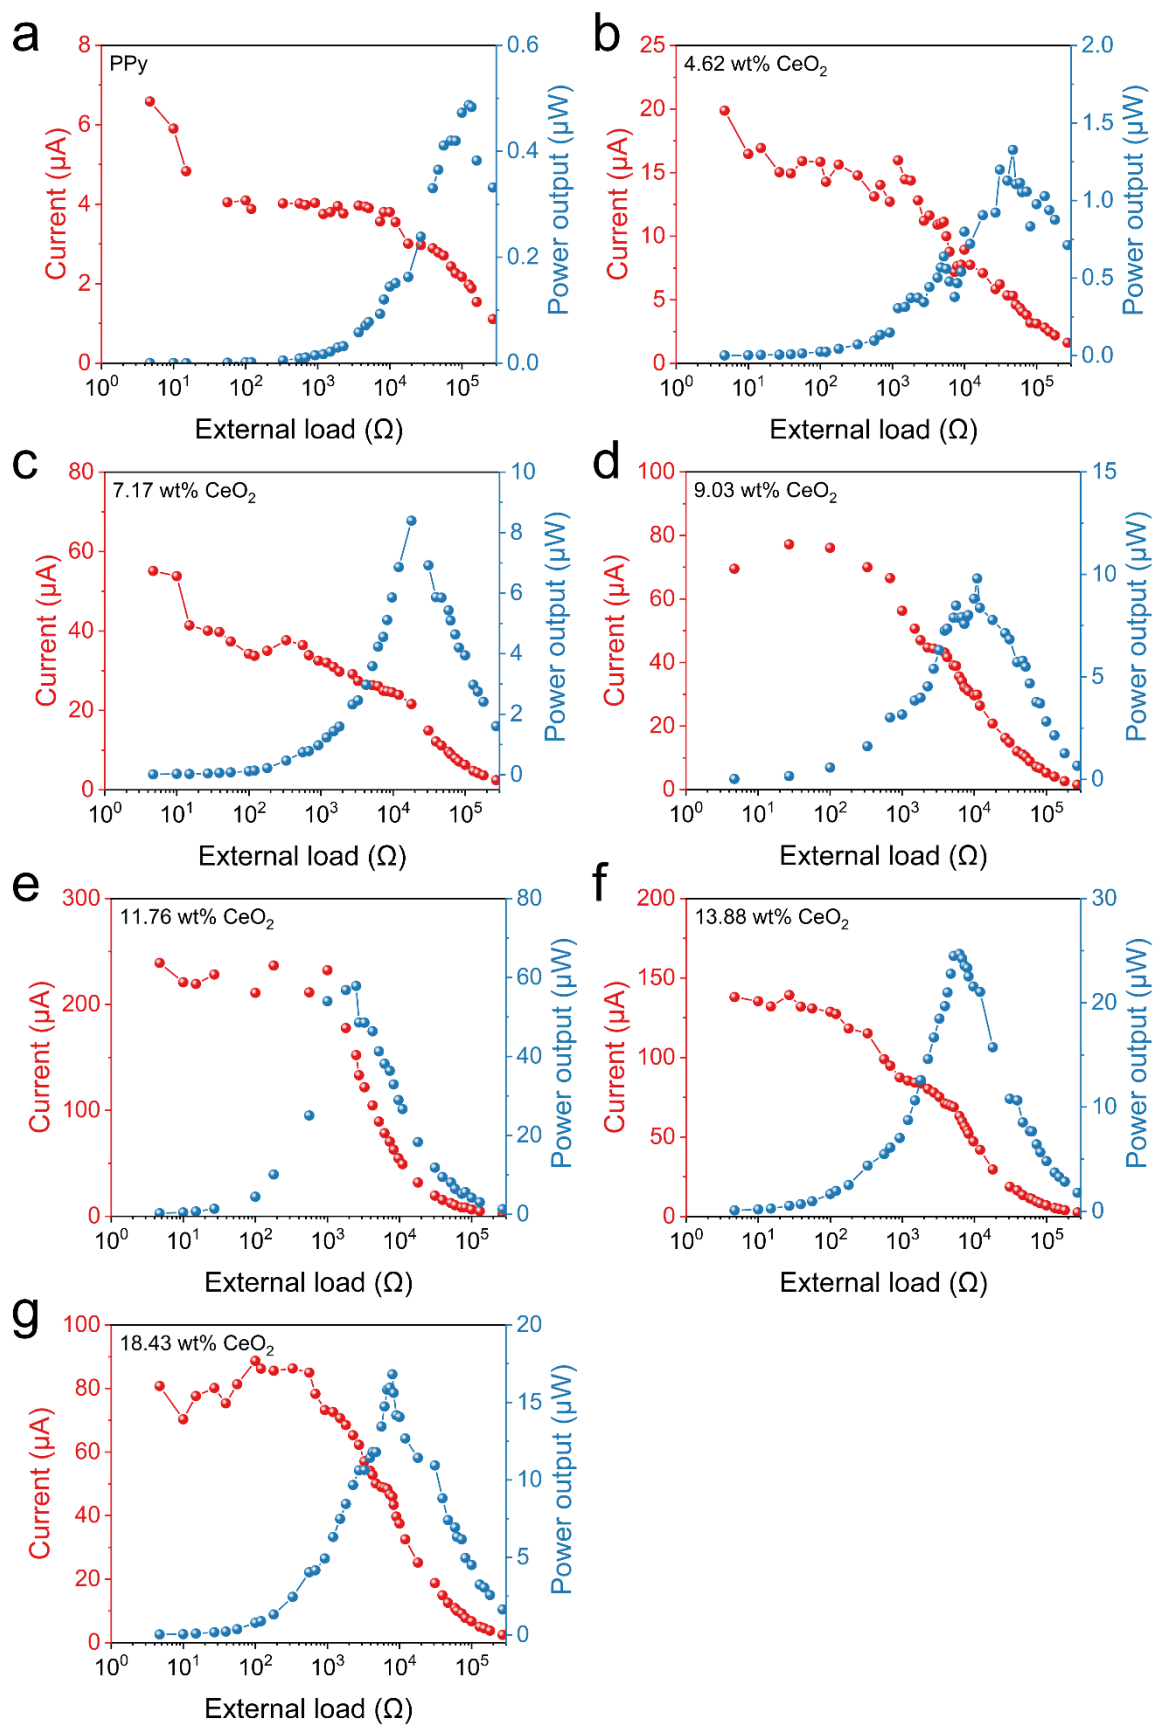

**Fig. S11** Dependency of the current and power outputs on external resistances for PPy-CeO<sub>2</sub> devices with (a) 0 wt%, (b) 4.62 wt%, (c) 7.17 wt%, (d) 9.03 wt%, (e) 11.76 wt%, (f) 13.88 wt%, (g) 18.43 wt% CeO<sub>2</sub> in the nanocomposite.

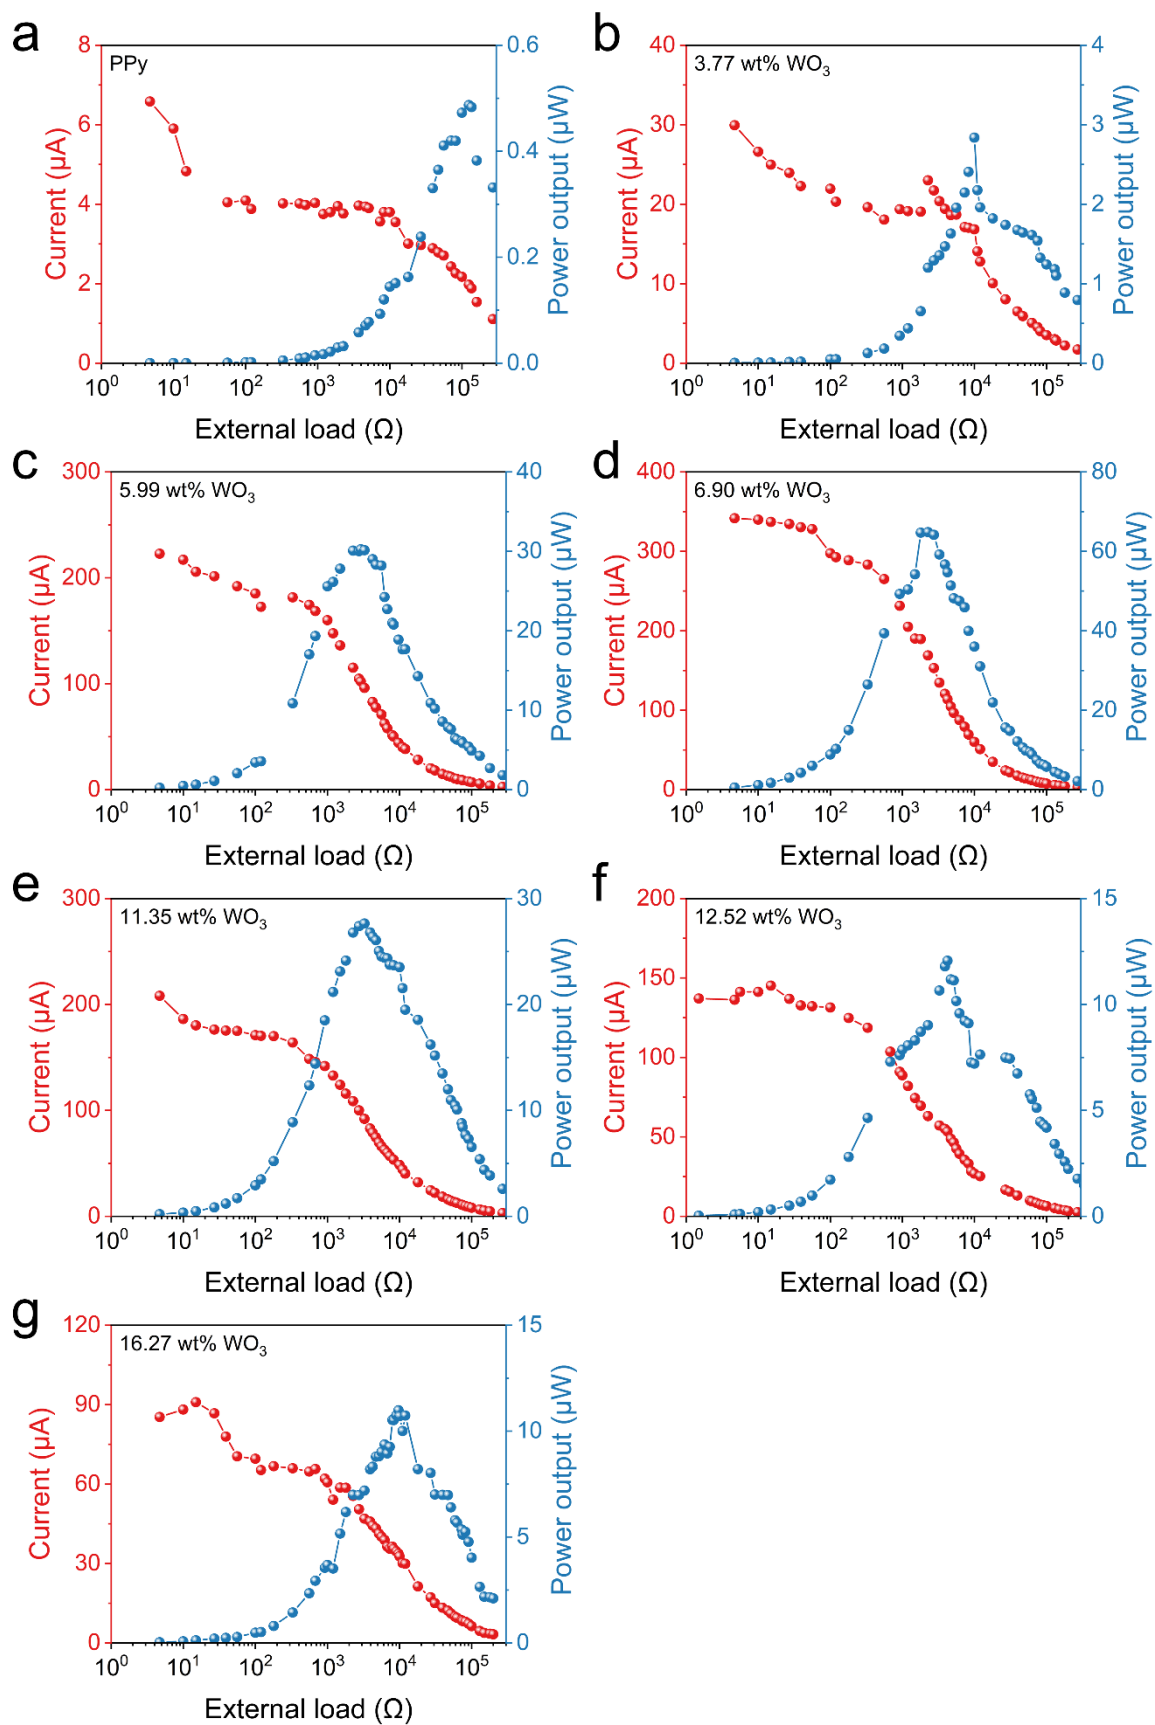

**Fig. S12** Dependency of the current and power outputs on external resistances for PPy-WO<sub>3</sub> devices with (a) 0 wt%, (b) 3.77 wt%, (c) 5.99 wt%, (d) 6.90 wt%, (e) 11.35 wt%, (f) 12.52 wt%, (g) 16.27 wt% different WO<sub>3</sub> in the nanocomposite.

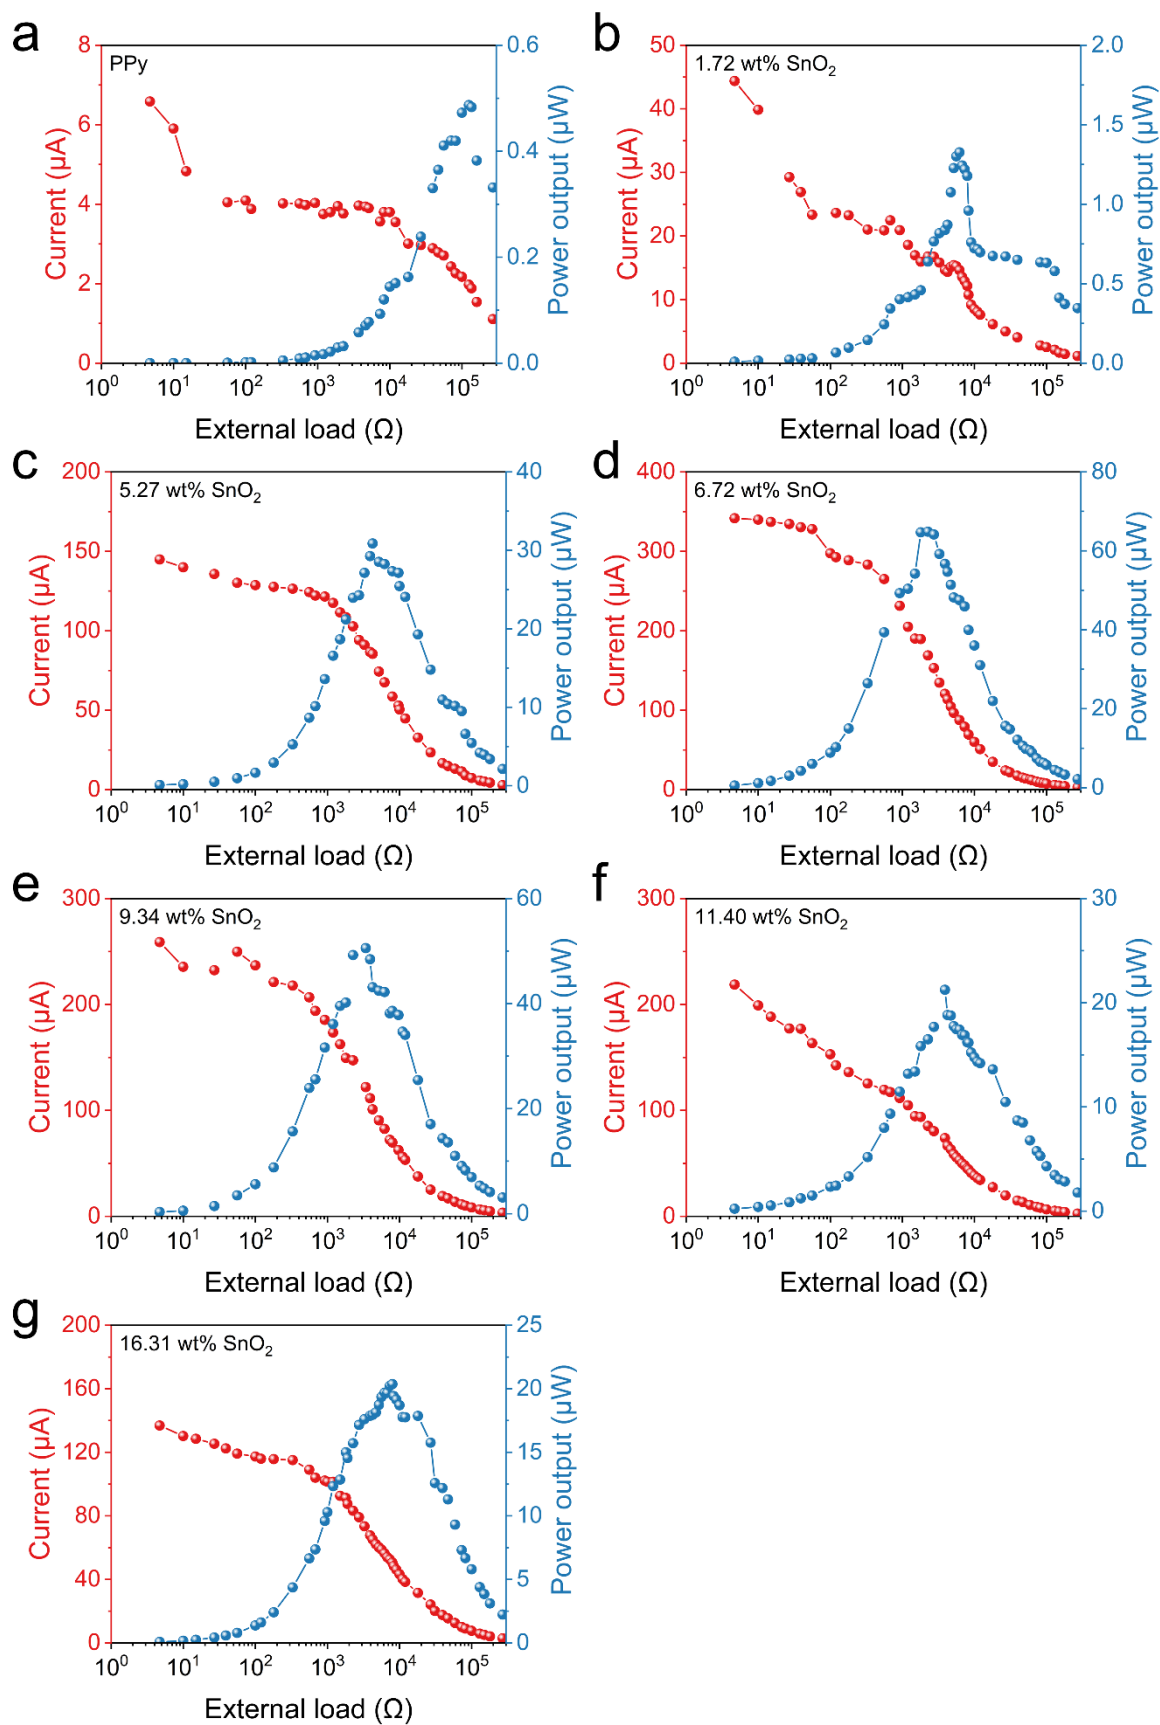

**Fig. S13** Dependency of the current and power outputs on external resistances for PPy-SnO<sub>2</sub> devices with (a) 0 wt%, (b) 1.72 wt%, (c) 5.27 wt%, (d) 6.72 wt%, (e) 9.34 wt%, (f) 11.40 wt%, (g) 16.31 wt% SnO<sub>2</sub> in the nanocomposite.

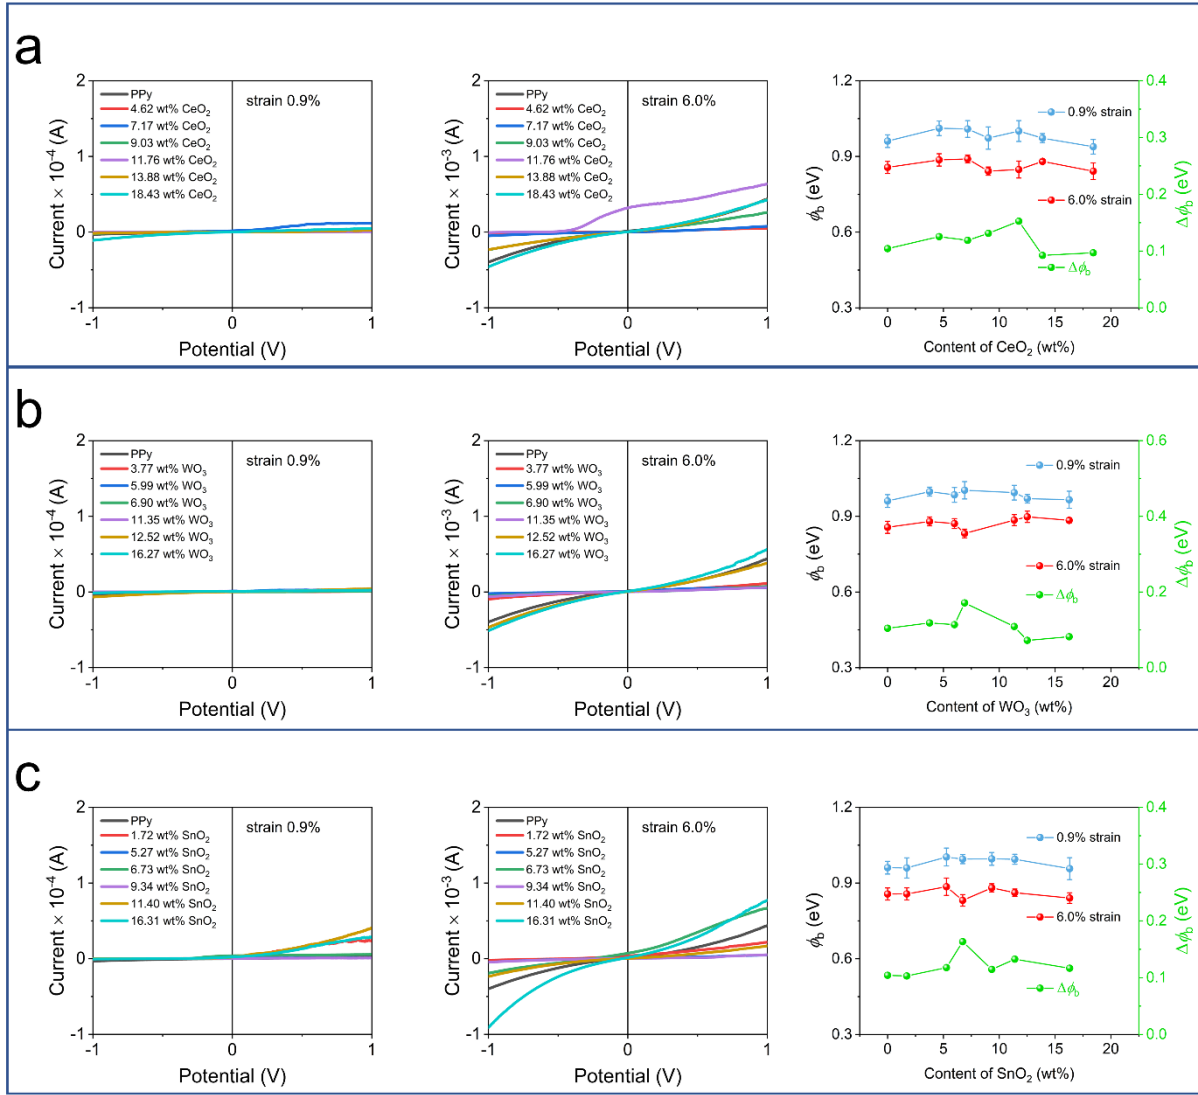

**Fig. S14** I–V curves and calculated Schottky barrier height ( $\phi_b$ ) of (a) PPy-CeO<sub>2</sub>, (b) PPy-WO<sub>3</sub>, and (c) PPy-SnO<sub>2</sub> devices with different metal oxide contents (the Au/PPy-based nanocomposites/Al devices at the strain levels of 0.9% and 6.0%).

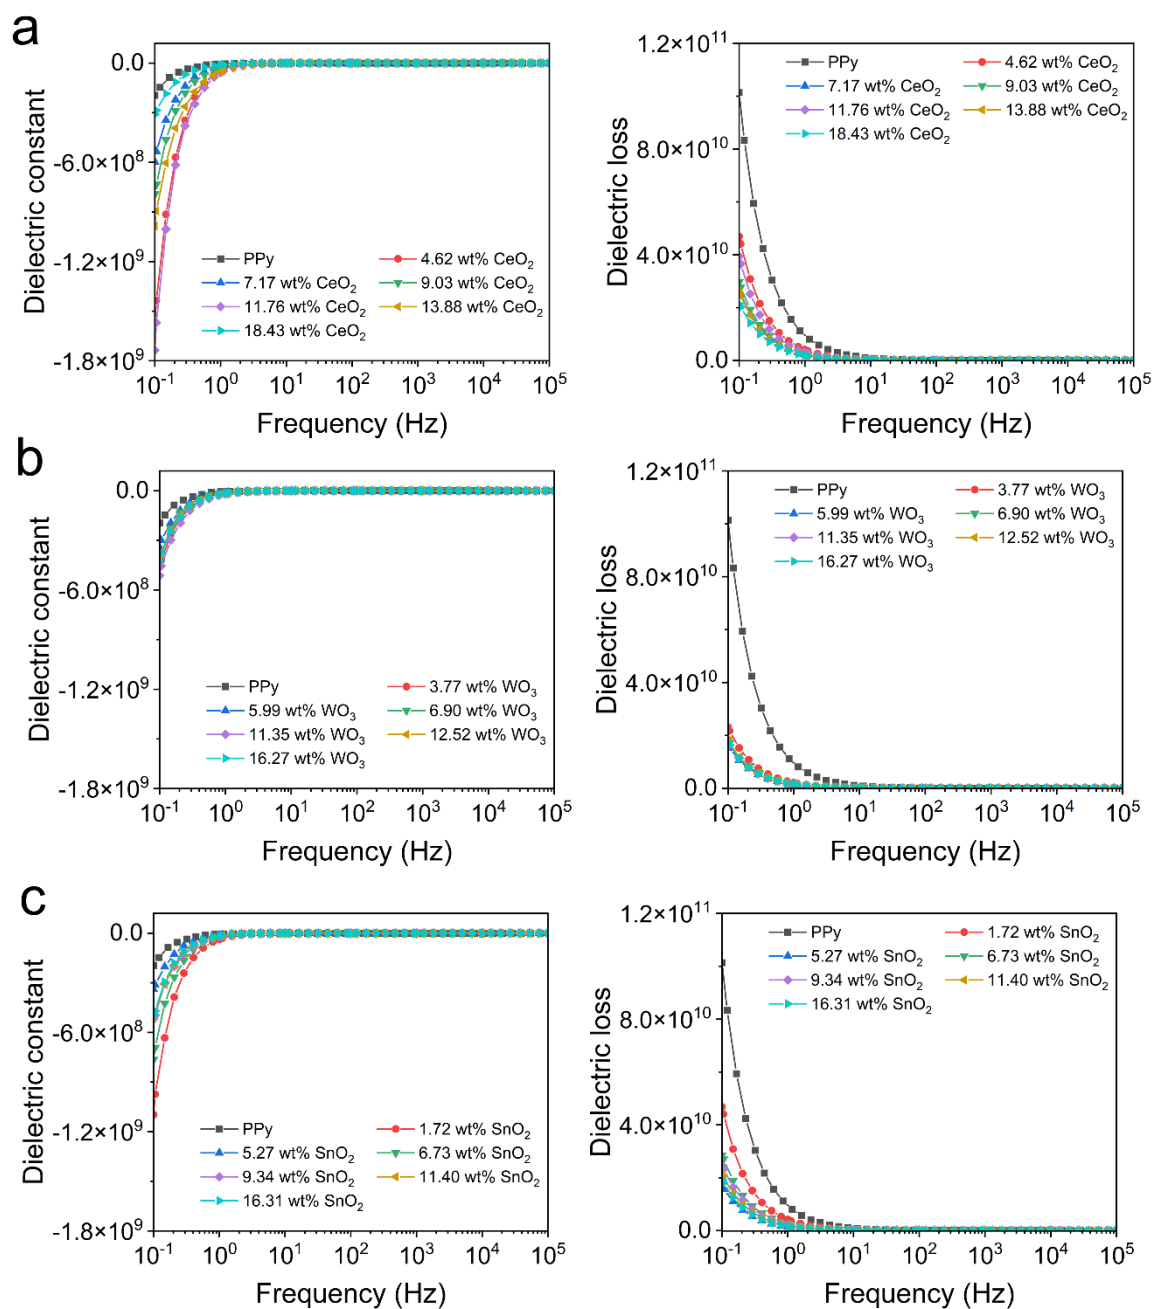

**Fig. S15** The dielectric constant and dielectric loss of (a) PPy-CeO<sub>2</sub>, (b) PPy-WO<sub>3</sub>, and (c) PPy-SnO<sub>2</sub> nanocomposites with different metal oxide contents.

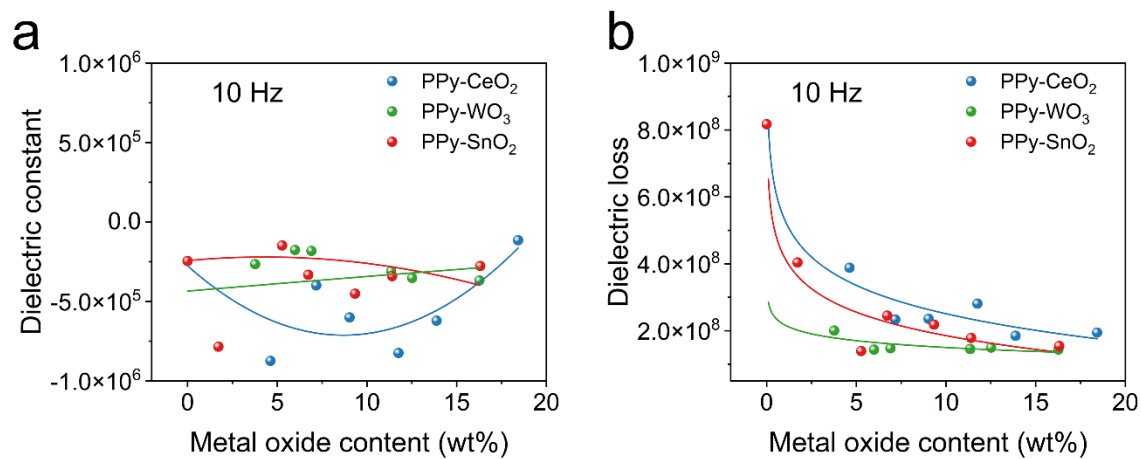

**Fig. S16** Effect of CeO<sub>2</sub>, WO<sub>3</sub>, and SnO<sub>2</sub> content on (a) dielectric constant and (b) dielectric loss of the nanocomposites (at 10 Hz).

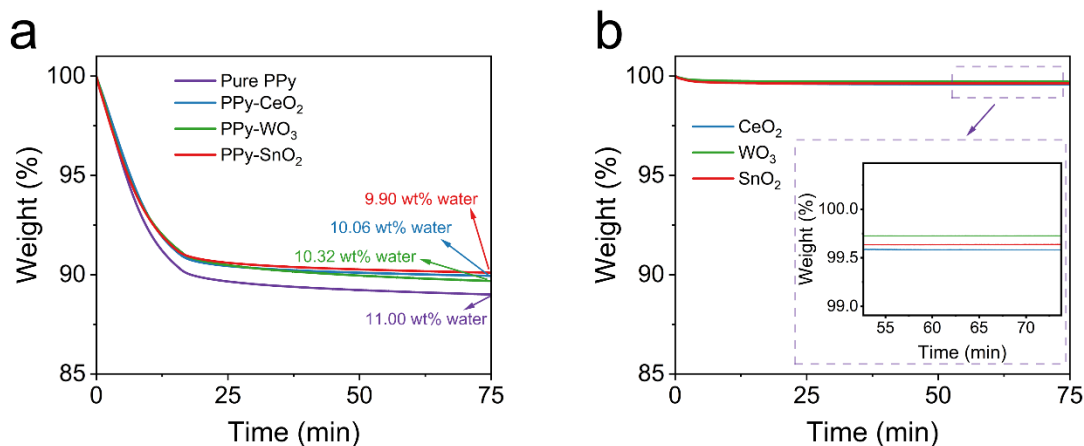

**Fig. S17** (a) Weight loss of PPy and PPy nanocomposites (metal oxide content 7.17 wt%, 6.90 wt%, and 6.73 wt% for PPy-CeO<sub>2</sub>, PPy-WO<sub>3</sub>, and PPy-SnO<sub>2</sub>) at 105 °C, (b) weight loss of three metal oxide powder at 105 °C.

The water content in PPy, PPy nanocomposites, and metal oxides was measured using a thermogravimetric analyzer (TGA, TA Q50). During testing, the weight loss was recorded by heating the sample to 105 °C (rate 5 °C min<sup>-1</sup>) and heating the sample at 105 °C for 60 minutes. Under the same conditions, the water contents of PPy, PPy-CeO<sub>2</sub>, PPy-WO<sub>3</sub>, and PPy-SnO<sub>2</sub> were measured as 11.00 wt%, 10.06 wt%, 10.32 wt%, and 9.90 wt%, respectively. In comparison, the water content of the metal oxide powder was much lower, 0.42 wt%, 0.27 wt%, and 0.36 wt% for CeO<sub>2</sub>, WO<sub>3</sub>, and SnO<sub>2</sub>, respectively. Because of the low water content in the metal oxide domain, the water content in the PPy domains was estimated by the equation:

$$WC_{PPy\ composites} = w_{PPy} * WC_{PPy} + w_{metal\ oxide} * WC_{metal\ oxide}$$

Here,  $WC$  is water content,  $w$  is the weight percent of each component in the composites. For PPy-CeO<sub>2</sub>, the water content in the PPy domains should be  $(10.06\% - 7.17\% * 0.42\%) / 92.83\% = 10.80\%$ . For PPy-WO<sub>3</sub> and PPy-SnO<sub>2</sub>, the water content was 11.06 wt% and 10.59 wt%, respectively. These values were either similar to or lower than the water content in pure PPy (11.00 wt%).

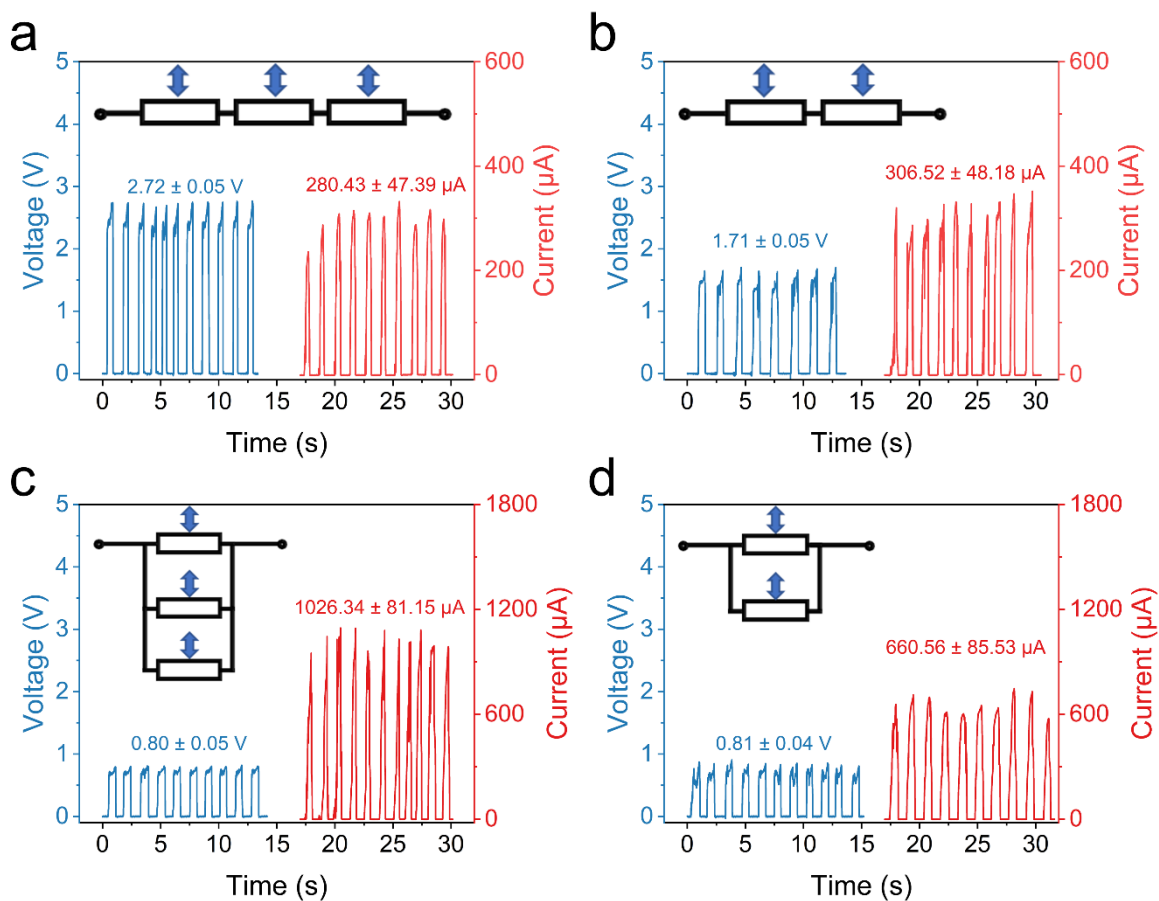

**Fig. S18** Electrical outputs of (a) three and (b) two devices series-connected coin devices. Electrical outputs of (a) three and (b) two devices parallel-connected coin devices.

## Reference

- 1 G. Jayakumar, A. A. Irudayaraj and A. D. Raj, *Appl. Phys. A.*, DOI:10.1007/s00339-019-3044-4.
- 2 C. Dulgerbaki and A. U. Oksuz, *Polym. Adv. Technol.*, 2016, **27**, 73–81.
- 3 R. D. Sakhare, Y. H. Navale, S. T. Navale and V. B. Patil, *J. Mater. Sci. Mater. Electron.*, 2017, **28**, 11132–11141.
